# Supplementary material for: Insensitive energetic 5-nitroaminotetrazolate ionic liquids
Source: Royal Society of Chemistry journal article supplement (doi:10.1039/c5ra07415k), 2015-01-01
Supplement: c5ra07415k1.pdf [file c5ra07415k1.pdf]

**Supporting Information**

**Insensitive 5-Nitroaminotetrazolate Ionic Liquids as Potential  
Liquid Energetic Materials**

Yi-Fei Gao, Lei Zhang, Ling He,\* Ning Tang, Wen-Li Yuan and Guo-Hong Tao\*

College of Chemistry, Sichuan University, Chengdu 610064 (China)

Fax: (+) 86-28-85470368

E-mail: lhe@scu.edu.cn, taogh@scu.edu.cn

Index:

Figure S1–S4 Table S1–S5 X-ray crystallography data of **1**

Scheme S1 The isodesmic reactions of the 1,3-dialkylimidazolium cations

Scheme S2 Born-Haber cycle for the formation of ionic liquids

Scheme S3 Combustion equations and thermochemical equations of Hess's Law for  
the ionic liquids **1–5**

Figure S1 Molecular Structure of 1.

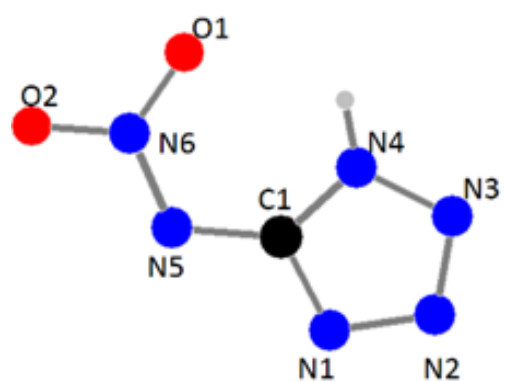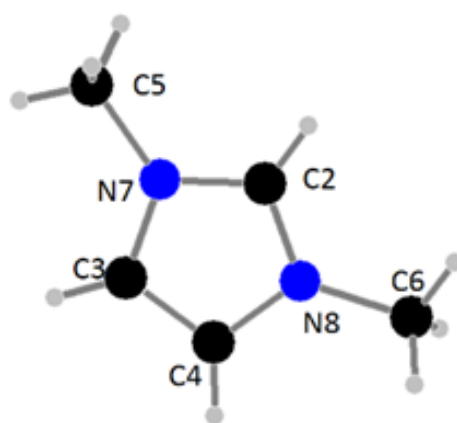

**Figure S2.** Packing Diagram of **1** Viewed down the *a*-axis.

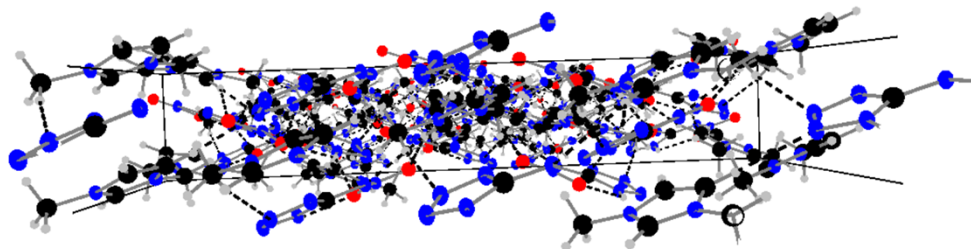

**Figure S3.** Packing Diagram of **1** Viewed down the *b*-axis.

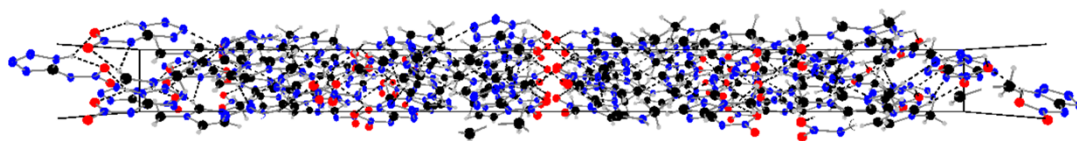

**Figure S4.** Packing Diagram of **1** Viewed down the *c*-axis.

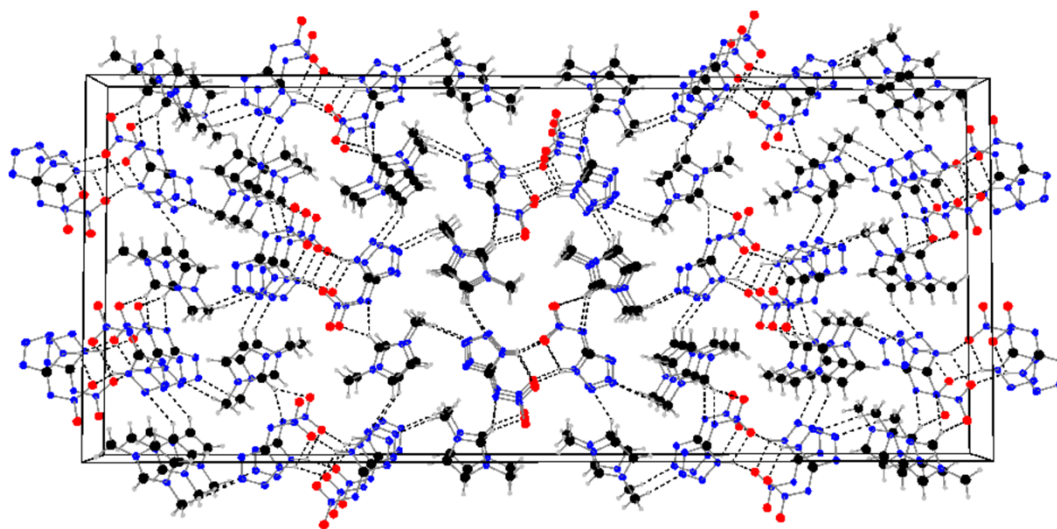

**Table S1 Fractional Atomic Coordinates ( $\times 10^4$ ) and Equivalent Isotropic Displacement Parameters ( $\text{\AA}^2 \times 10^3$ ) for 1.  $U_{\text{eq}}$  is defined as 1/3 of the trace of the orthogonalised  $U_{ij}$  tensor.**

| Atom | $x$       | $y$       | $z$      | $U(\text{eq})$ |
|------|-----------|-----------|----------|----------------|
| N8   | 4070.8(3) | 5506.8(6) | 131(4)   | 19.1(3)        |
| N7   | 4395.0(3) | 4824.8(6) | 760(4)   | 19.0(3)        |
| C2   | 4333.3(3) | 5407.9(8) | -381(5)  | 20.3(3)        |
| C4   | 3959.8(3) | 4965.0(8) | 1667(5)  | 23.1(4)        |
| C3   | 4163.1(3) | 4540.4(8) | 2057(5)  | 22.3(4)        |
| C6   | 3924.3(4) | 6094.5(8) | -779(5)  | 25.8(4)        |
| C5   | 4666.0(3) | 4536.6(9) | 690(6)   | 32.6(4)        |
| O1   | 4940.6(2) | 1908.5(5) | 8062(3)  | 23.7(3)        |
| O2   | 4832.4(3) | 981.0(5)  | 10368(4) | 29.7(3)        |
| N1   | 4171.8(3) | 2441.6(6) | 8569(4)  | 23.4(3)        |
| N2   | 4159.9(3) | 3044.2(7) | 7224(5)  | 25.7(3)        |
| N3   | 4396.7(3) | 3237.0(6) | 6167(4)  | 24.9(3)        |
| N4   | 4569.1(3) | 2749.6(6) | 6831(4)  | 20.2(3)        |
| N5   | 4505.4(3) | 1662.4(6) | 9452(4)  | 20.0(3)        |
| N6   | 4765.5(3) | 1524.9(6) | 9275(4)  | 19.2(3)        |
| C1   | 4429.8(3) | 2262.9(7) | 8299(4)  | 17.6(3)        |

**Table S2 Anisotropic Displacement Parameters ( $\text{\AA}^2 \times 10^3$ ) for 1. The Anisotropic displacement factor exponent takes the form:  $-2\pi^2[h^2a^2U_{11}+2hka^2b^2U_{12}+\dots]$ .**

| Atom | $U_{11}$ | $U_{22}$ | $U_{33}$ | $U_{23}$ | $U_{13}$ | $U_{12}$ |
|------|----------|----------|----------|----------|----------|----------|
| N8   | 19.8(7)  | 15.9(6)  | 21.5(7)  | 1.3(6)   | -0.1(6)  | -0.8(5)  |
| N7   | 15.6(7)  | 20.7(6)  | 20.7(7)  | -1.0(6)  | -0.8(6)  | -0.6(5)  |
| C2   | 19.4(8)  | 21.2(8)  | 20.3(8)  | -0.6(6)  | -1.2(6)  | -4.6(6)  |
| C4   | 18.1(8)  | 20.0(8)  | 31.3(9)  | 1.8(7)   | 4.6(7)   | -3.5(6)  |
| C3   | 21.7(9)  | 18.5(8)  | 26.6(9)  | 4.0(7)   | 2.4(7)   | -1.3(6)  |
| C6   | 28.0(9)  | 18.6(8)  | 30.7(10) | 3.8(7)   | -3.6(7)  | 3.0(7)   |
| C5   | 16.7(9)  | 35.9(10) | 45.1(11) | -2.1(10) | -1.1(8)  | 5.5(7)   |
| O1   | 15.1(6)  | 22.9(6)  | 33.2(7)  | 4.4(5)   | 1.1(5)   | -3.4(4)  |
| O2   | 26.2(7)  | 21.5(6)  | 41.4(8)  | 10.7(6)  | 3.4(6)   | 5.7(5)   |
| N1   | 17.4(7)  | 21.9(7)  | 30.9(8)  | 2.1(7)   | 0.4(6)   | 0.7(5)   |
| N2   | 21.4(7)  | 22.1(7)  | 33.6(8)  | 1.0(7)   | -2.2(6)  | 3.8(6)   |
| N3   | 21.4(7)  | 20.2(7)  | 33.2(9)  | 2.8(7)   | -1.4(6)  | 2.5(5)   |
| N4   | 15.2(6)  | 18.3(6)  | 27.3(7)  | 2.7(6)   | -0.7(5)  | 0.0(5)   |
| N5   | 14.9(7)  | 17.8(6)  | 27.4(7)  | 1.7(6)   | 1.6(6)   | 0.0(5)   |
| N6   | 18.8(7)  | 18.0(6)  | 20.7(7)  | 1.0(6)   | 0.7(5)   | -1.1(5)  |
| C1   | 16.1(8)  | 17.4(7)  | 19.2(7)  | -1.6(7)  | -2.0(6)  | -2.0(6)  |

**Table S3 Bond Lengths for 1.**

| AtomAtom | Length/Å   | AtomAtom | Length/Å   |
|----------|------------|----------|------------|
| N8 C2    | 1.325(2)   | O2 N6    | 1.2512(17) |
| N8 C4    | 1.381(2)   | N1 C1    | 1.330(2)   |
| N8 C6    | 1.465(2)   | N1 N2    | 1.3558(19) |
| N7 C2    | 1.326(2)   | N2 N3    | 1.296(2)   |
| N7 C3    | 1.376(2)   | N3 N4    | 1.3500(18) |
| N7 C5    | 1.466(2)   | N4 C1    | 1.343(2)   |
| C4 C3    | 1.347(2)   | N5 N6    | 1.3165(18) |
| O1 N6    | 1.2615(17) | N5 C1    | 1.378(2)   |

**Table S4 Bond Angles for 1.**

| AtomAtomAtom | Angle/     | AtomAtomAtom | Angle/     |
|--------------|------------|--------------|------------|
| C2 N8 C4     | 108.58(13) | N3 N2 N1     | 111.13(13) |
| C2 N8 C6     | 125.48(14) | N2 N3 N4     | 106.17(13) |
| C4 N8 C6     | 125.94(14) | C1 N4 N3     | 108.83(13) |
| C2 N7 C3     | 108.50(13) | N6 N5 C1     | 116.59(12) |
| C2 N7 C5     | 125.56(14) | O2 N6 O1     | 120.78(13) |
| C3 N7 C5     | 125.93(14) | O2 N6 N5     | 116.09(13) |
| N8 C2 N7     | 108.81(14) | O1 N6 N5     | 123.13(13) |
| C3 C4 N8     | 106.82(14) | N1 C1 N4     | 107.91(14) |
| C4 C3 N7     | 107.28(14) | N1 C1 N5     | 119.46(14) |
| C1 N1 N2     | 105.95(13) | N4 C1 N5     | 132.63(14) |

**Table S5 Torsion Angles for 1.**

| A B C D     | Angle/      | A B C D     | Angle/      |
|-------------|-------------|-------------|-------------|
| C4 N8 C2 N7 | 0.04(19)    | N1 N2 N3 N4 | 0.00(19)    |
| C6 N8 C2 N7 | 179.93(15)  | N2 N3 N4 C1 | 0.09(18)    |
| C3 N7 C2 N8 | -0.07(19)   | C1 N5 N6 O2 | 179.21(14)  |
| C5 N7 C2 N8 | -179.36(16) | C1 N5 N6 O1 | -1.3(2)     |
| C2 N8 C4 C3 | 0.02(19)    | N2 N1 C1 N4 | 0.14(18)    |
| C6 N8 C4 C3 | -179.88(17) | N2 N1 C1 N5 | -179.68(15) |
| N8 C4 C3 N7 | -0.1(2)     | N3 N4 C1 N1 | -0.15(18)   |
| C2 N7 C3 C4 | 0.1(2)      | N3 N4 C1 N5 | 179.64(17)  |
| C5 N7 C3 C4 | 179.36(17)  | N6 N5 C1 N1 | -176.84(15) |

C1 N1 N2 N3    -0.09(19)            N6 N5 C1 N4            3.4(3)

**Table S6 Hydrogen Atom Coordinates ( $\text{\AA}\times 10^4$ ) and Isotropic Displacement Parameters ( $\text{\AA}^2\times 10^3$ ) for 1.**

| Atom | <i>x</i> | <i>y</i> | <i>z</i> | U(eq) |
|------|----------|----------|----------|-------|
| H2   | 4457     | 5706     | -1400    | 24    |
| H4   | 3775     | 4903     | 2322     | 28    |
| H3   | 4149     | 4122     | 3044     | 27    |
| H6A  | 3870     | 6314     | 1449     | 39    |
| H6B  | 3762     | 5988     | -2189    | 39    |
| H6C  | 4042     | 6375     | -2204    | 39    |
| H5A  | 4724     | 4482     | -1822    | 49    |
| H5B  | 4661     | 4119     | 1890     | 49    |
| H5C  | 4794     | 4817     | 1956     | 49    |
| H4A  | 4744     | 2751     | 6375     | 24    |

**Scheme S1** The isodesmic reactions of the 1,3-dialkylimidazolium cations.

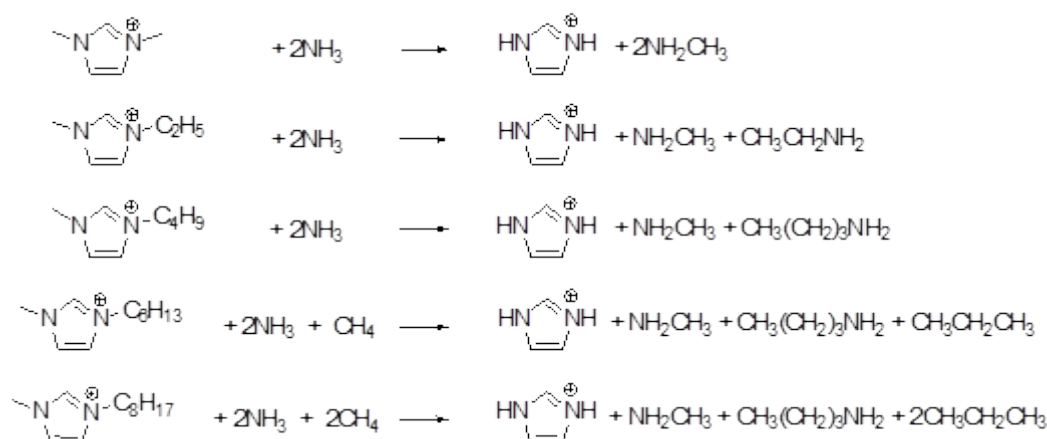

**Scheme S2** Born-Haber cycle for the formation of ionic liquids.

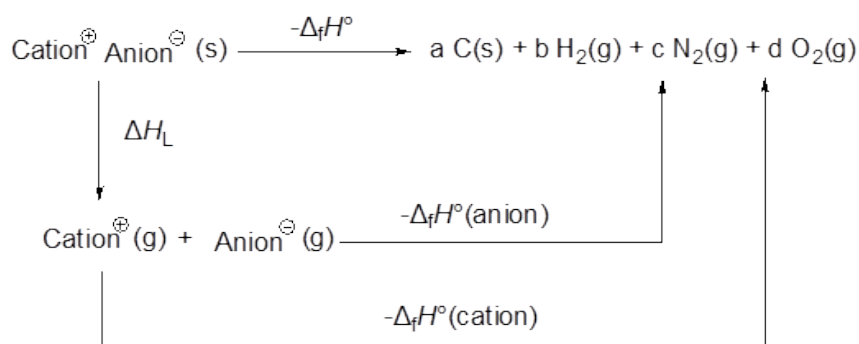

where a, b, c, d are the numbers of moles of the respective products

**Scheme S3** Combustion equations and thermochemical equations of Hess's Law for the ionic liquids 1–5.

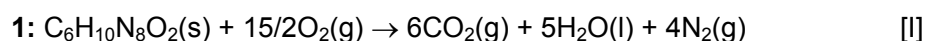

$$\Delta_f H_{298}^\circ (\mathbf{1}, \text{s}) = 6\Delta_f H_{298}^\circ (\text{CO}_2, \text{g}) + 5\Delta_f H_{298}^\circ (\text{H}_2\text{O}, \text{l}) - \Delta_c H_{298}^\circ (\mathbf{1}, \text{s}) \quad (4)$$

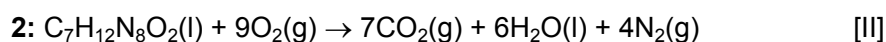

$$\Delta_f H_{298}^\circ (\mathbf{2}, \text{l}) = 7\Delta_f H_{298}^\circ (\text{CO}_2, \text{g}) + 6\Delta_f H_{298}^\circ (\text{H}_2\text{O}, \text{l}) - \Delta_c H_{298}^\circ (\mathbf{2}, \text{l}) \quad (5)$$

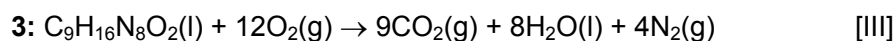

$$\Delta_f H_{298}^\circ (\mathbf{3}, \text{l}) = 9\Delta_f H_{298}^\circ (\text{CO}_2, \text{g}) + 8\Delta_f H_{298}^\circ (\text{H}_2\text{O}, \text{l}) - \Delta_c H_{298}^\circ (\mathbf{3}, \text{l}) \quad (6)$$

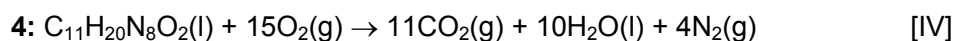

$$\Delta_f H_{298}^\circ (\mathbf{4}, \text{l}) = 11\Delta_f H_{298}^\circ (\text{CO}_2, \text{g}) + 10\Delta_f H_{298}^\circ (\text{H}_2\text{O}, \text{l}) - \Delta_c H_{298}^\circ (\mathbf{4}, \text{l}) \quad (7)$$

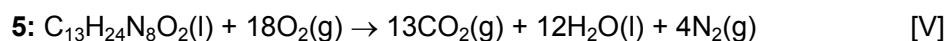

$$\Delta_f H_{298}^\circ (\mathbf{5}, \text{l}) = 13\Delta_f H_{298}^\circ (\text{CO}_2, \text{g}) + 12\Delta_f H_{298}^\circ (\text{H}_2\text{O}, \text{l}) - \Delta_c H_{298}^\circ (\mathbf{5}, \text{l}) \quad (8)$$
